# Supplementary material
Source: MDPI journal article supplement (https://www.mdpi.com/1999-4907/7/8/174)
Supplement: s1 [file s1]

## Supplementary material

**Table S1.** Main characteristics of the selected beech forests and trees. Mean (minimum–maximum) age and diameter in 2008.

| Ecoregion | Forest name<br>or location<br>(points in Figure 1) | Number<br>of trees<br>(of stands) | Mean age<br>(year)<br>(min.-max.) | Mean diameter<br>(cm)<br>(min.-max.) | Elevation (m) | Soil<br>texture           |
|-----------|----------------------------------------------------|-----------------------------------|-----------------------------------|--------------------------------------|---------------|---------------------------|
| Lowlands  | Ravenhof                                           | 1 (x)                             | 87                                | 54                                   | 15            | Sand                      |
| Lowlands  | Buggenhoutbos                                      | 2 (x)                             | 141 (141–141)                     | 78 (65–90)                           | 24            | Sandy-loam                |
| Lowlands  | Bulskampveld                                       | 3 (x)                             | 103 (100–108)                     | 71 (62–86)                           | 27            | Sand                      |
| Lowlands  | Wijnendaele                                        | 1 (x)                             | 105                               | 81                                   | 34            | Loamy-sand                |
| Lowlands  | Ravels                                             | 5 (x)                             | 88 (87–92)                        | 43 (35–52)                           | 38            | Loamy-sand and sand       |
| Lowlands  | Bertembos                                          | 2 (x)                             | 144 (118–171)                     | 66 (54–79)                           | 61            | Loam                      |
| Lowlands  | Polygoonbos                                        | 1 (x)                             | 89 (89–89)                        | 52 (52–52)                           | 62            | Sandy-loam                |
| Lowlands  | Chartreuzebos                                      | 5 (x)                             | 96 (87–105)                       | 65 (59–74)                           | 74            | Sandy-loam and sand       |
| Lowlands  | Heverleebos                                        | 2 (x)                             | 148 (143–153)                     | 61 (57–65)                           | 78            | Sandy-loam and loamy-sand |
| Lowlands  | Muziekbos                                          | 1 (x)                             | 109                               | 60                                   | 92            | Sandy-loam                |
| Lowlands  | Meerdaalwoud                                       | 12 (x)                            | 146 (91–186)                      | 70 (56–86)                           | 102           | Loam and sandy-loam       |
| Lowlands  | Soignes–Zoniën                                     | 41 (2+x)                          | 133 (93–174)                      | 68 (48–94)                           | 110           | Loam                      |
| Lowlands  | Flobecq                                            | 8 (1)                             | 93 (87–104)                       | 67 (57–76)                           | 113           | Loam                      |
| Lowlands  | Kluisbos                                           | 1 (x)                             | 88                                | 64                                   | 117           | Sandy-loam                |
| Uplands   | Tihange                                            | 13 (1)                            | 102 (87–124)                      | 71 (60–84)                           | 239           | Loam                      |
| Uplands   | Hestreux                                           | 10 (1)                            | 128 (116–132)                     | 62 (51–79)                           | 397           | Loam*                     |
| Uplands   | Recogne                                            | 12 (1)                            | 175 (162–186)                     | 63 (56–75)                           | 456           | Loam*                     |
| Uplands   | Fourneau<br>Saint-Michel                           | 10 (1)                            | 120 (98–154)                      | 49 (39–62)                           | 484           | Loam*                     |
| Uplands   | Nassogne                                           | 8 (1)                             | 94 (92–95)                        | 43 (34–55)                           | 539           | Loam*                     |
| Uplands   | Rocherath                                          | 12 (1)                            | 133 (109–153)                     | 62 (53–72)                           | 607           | Loam*                     |

In each forest, trees were selected by stands (Latte et al. 2015a, b, c) or individually (indicated as 'x') (Kint et al. 2012; Aertsen et al. 2014). \* indicates texture with stone content ( $\geq 15\%$ ).

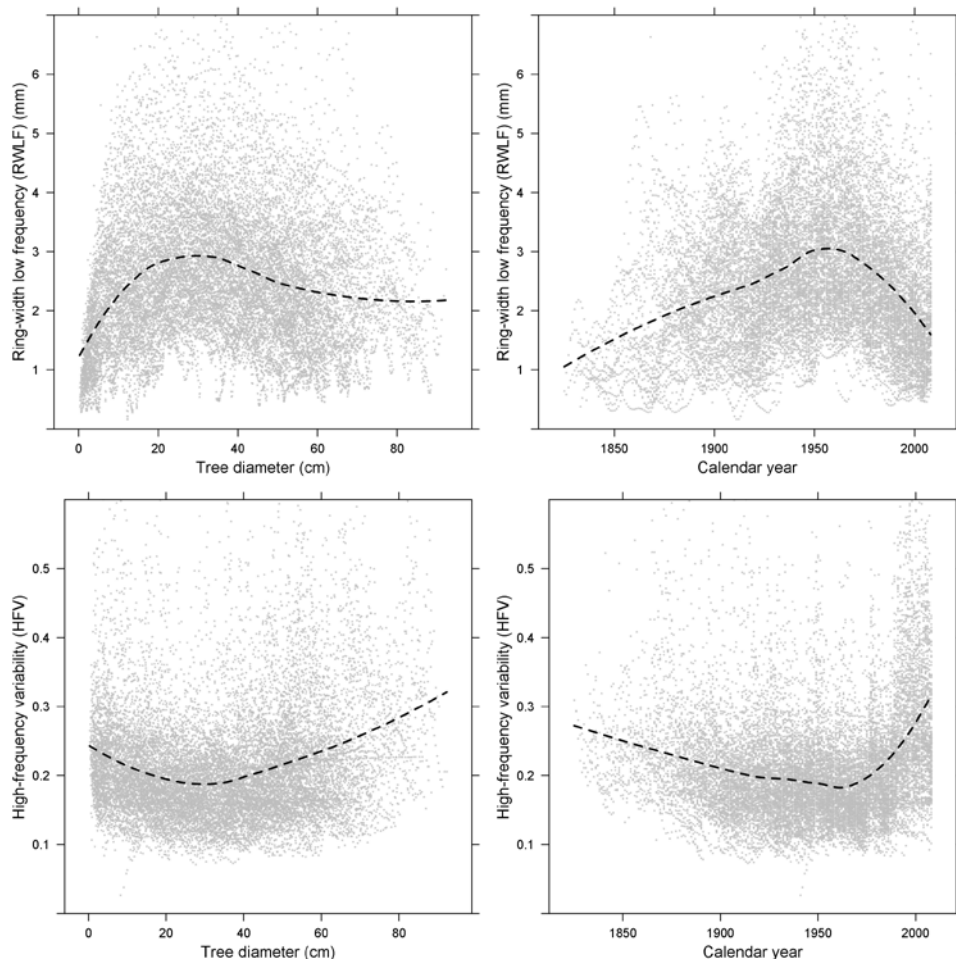

**Figure S1.** Ring-width low frequency (*RWLF*, top) and high-frequency variability (*HFV*, bottom) according to the tree diameter (left) and the calendar year (right). Grey dots indicate raw values. Dashed lines indicate mean trends (LOESS).

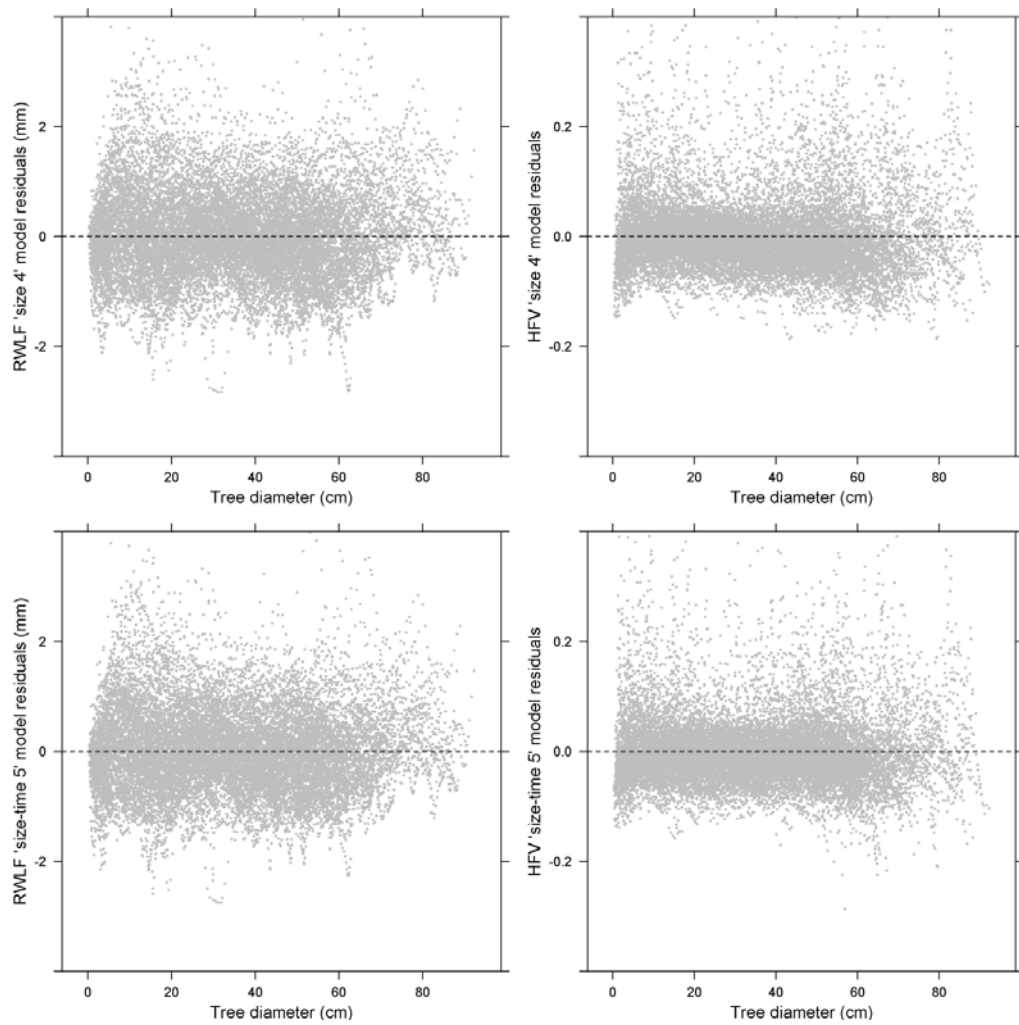

**Figure S2.** Residuals according to tree diameter of the 'size 4' models (top) and 'size-time 5' models (bottom) of ring-width low frequency (*RWLF*, left) and high-frequency variability (*HFV*, right).

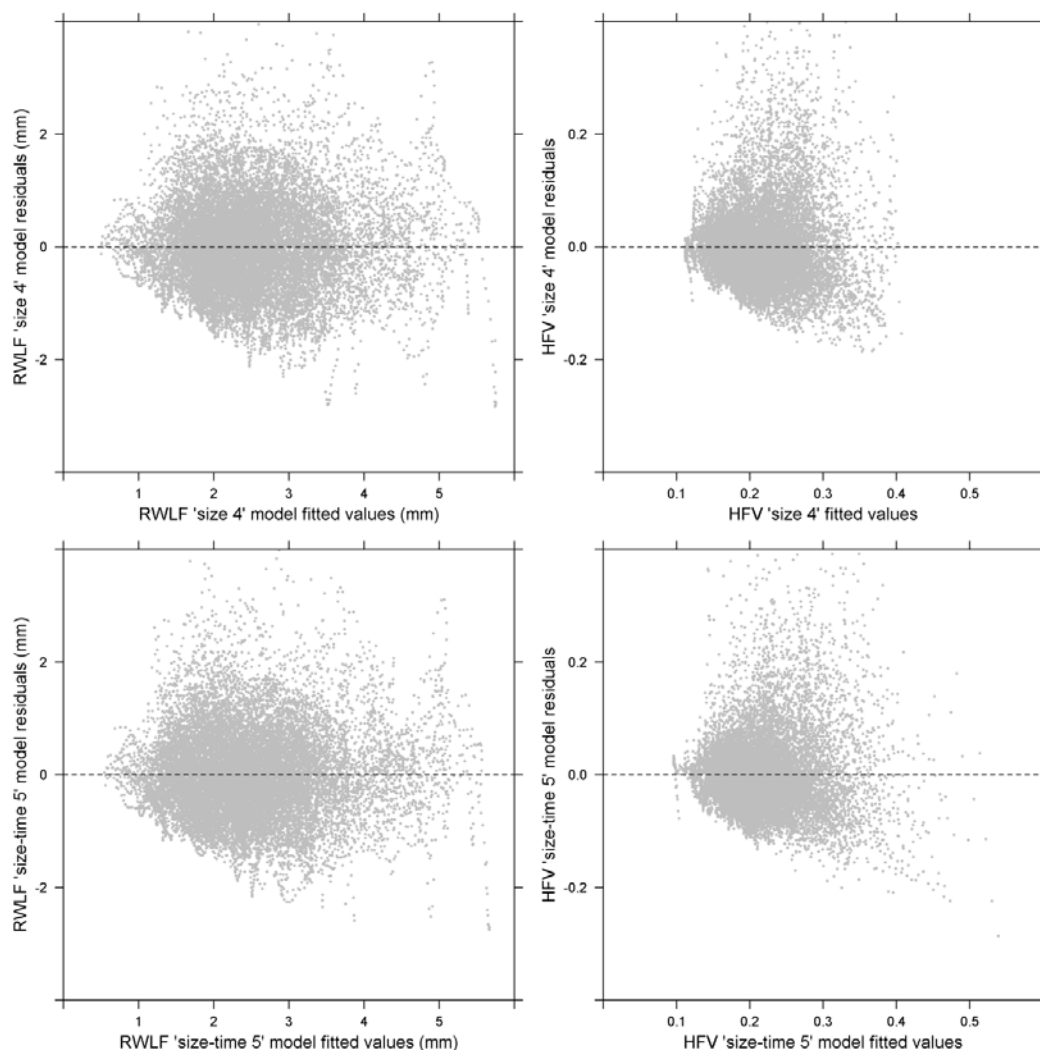

**Figure S3.** Residuals according to fitted values of the 'size 4' models (top) and 'size-time 5' models (bottom) of ring-width low frequency (*RWLF*, left) and high-frequency variability (*HFV*, right).

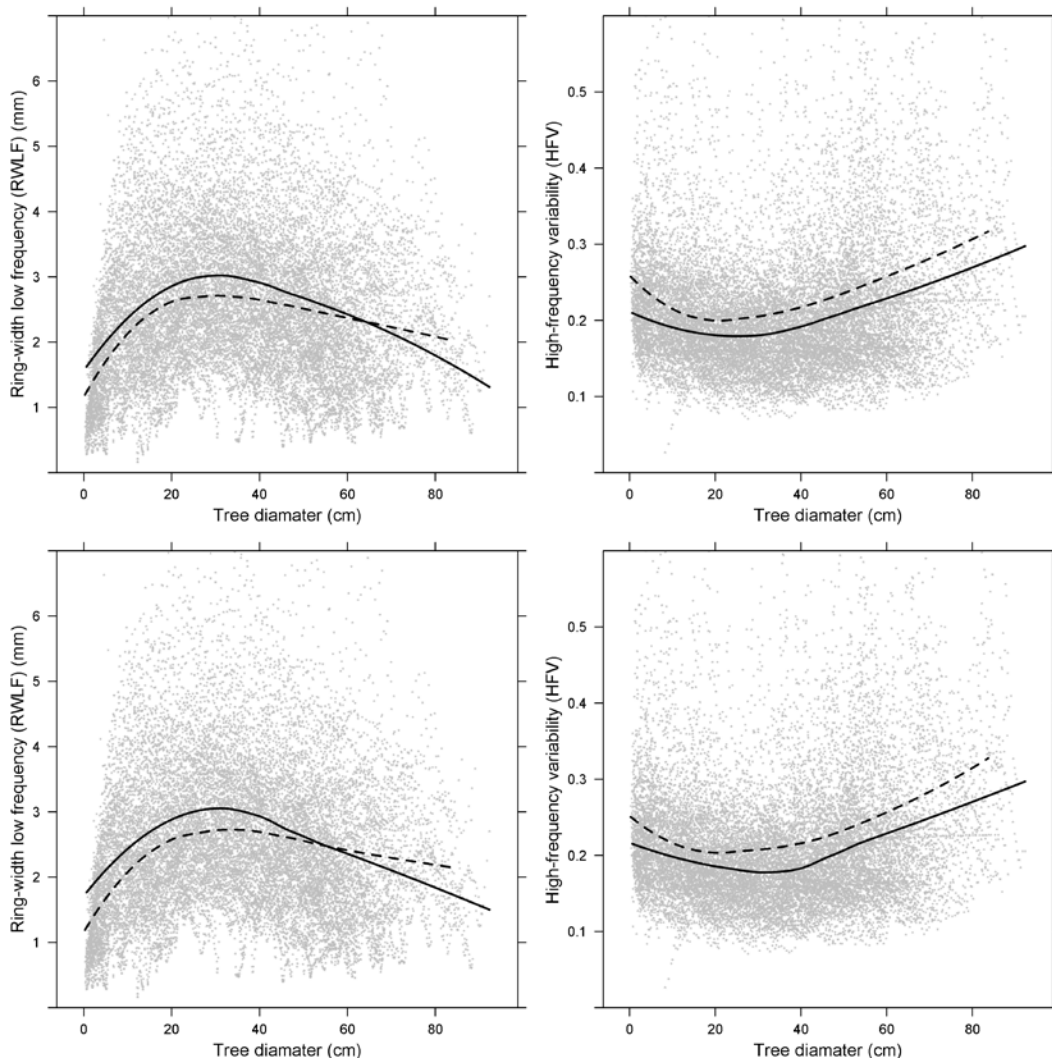

**Figure S4.** Fitted values according to the tree diameter for lowlands (full lines) and uplands (dashed lines) of the 'size 4' (top) and 'size-time 5' (bottom) models of ring-width low frequency (*RWLF*, left) and high-frequency variability (*HFV*, right). Grey dots indicate raw values. Lines are mean trends (LOESS)
